# Supplementary material for: Zebrafish androgen receptor is required for spermatogenesis and maintenance of ovarian function
Source: PubMed Central journal article supplement (PMC5966271; doi:10.18632/oncotarget.24407), 2018-02-06
Supplement: oncotarget-09-24320-s001.pdf [file oncotarget-09-24320-s001.pdf]

# Zebrafish androgen receptor is required for spermatogenesis and maintenance of ovarian function

## SUPPLEMENTARY MATERIALS

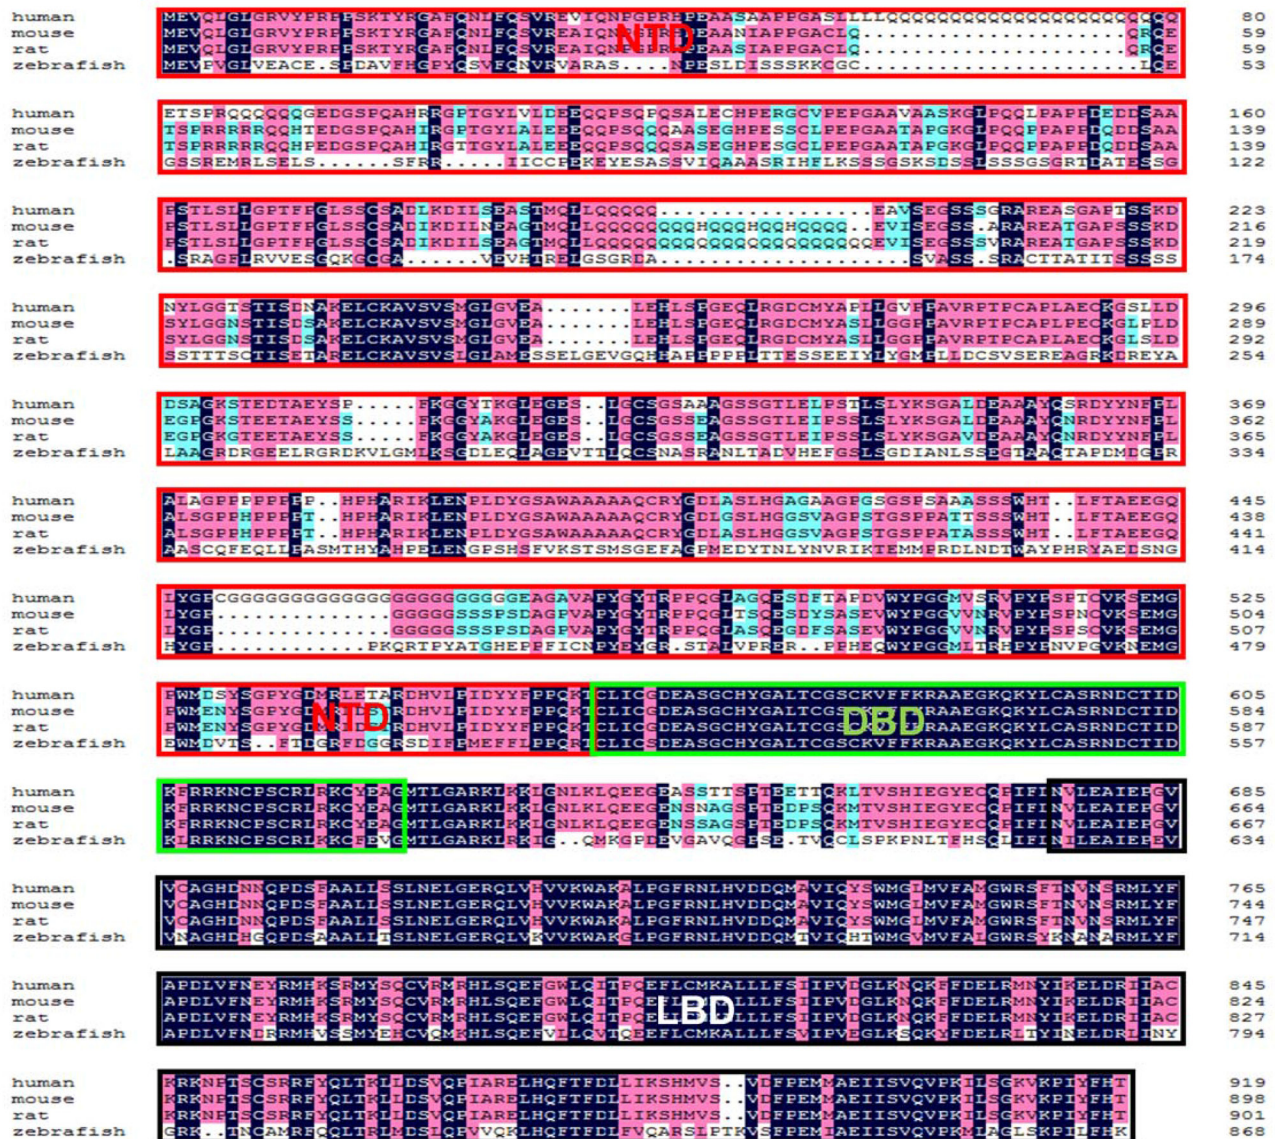

Supplementary Figure 1: Alignment of amino acid sequences of human AR (ENSP0000036322), mouse *Ar* (ENSMUSP0000052648), Rat *Ar* (ENSRNOP0000009129) and zebrafish *ar* (ENSDARP0000088795). N-terminal transactivation domain (NTD) is circled by red box; DNA-binding domain (DBD) is circled by green box; ligand-binding domain (LBD) is circled by black box. The same amino acids are marked by deep-blue background.

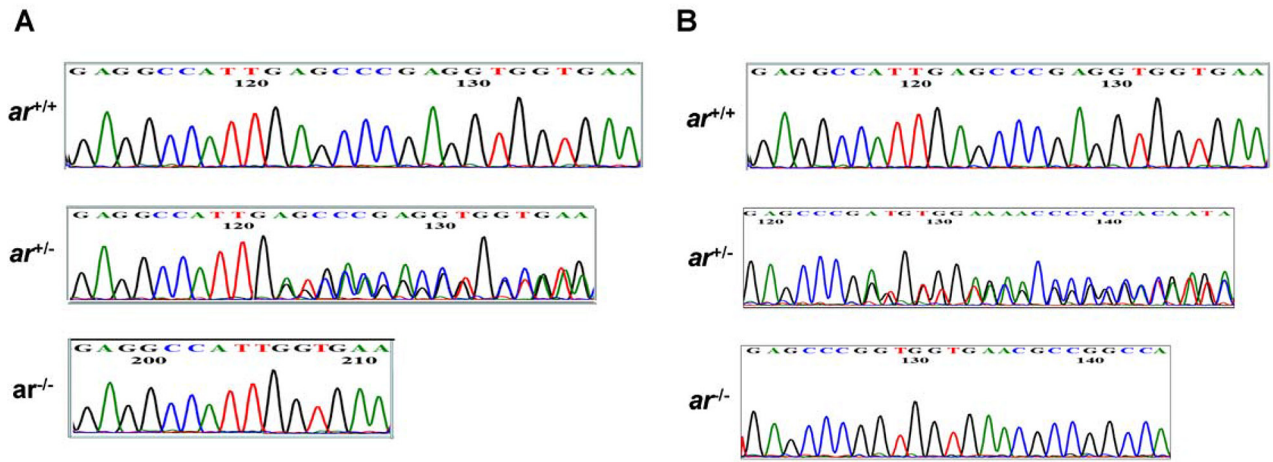

Supplementary Figure 2: Sequencing results of the targeted region from wildtype (*ar*<sup>+/+</sup>), heterozygous (*ar*<sup>+/-</sup>) and homozygous (*ar*<sup>-/-</sup>) zebrafish. (A) The mutant *ar*<sup>ihb1225/ihb1225</sup>. (B) The mutant *ar*<sup>ihb1226/ihb1226</sup>.

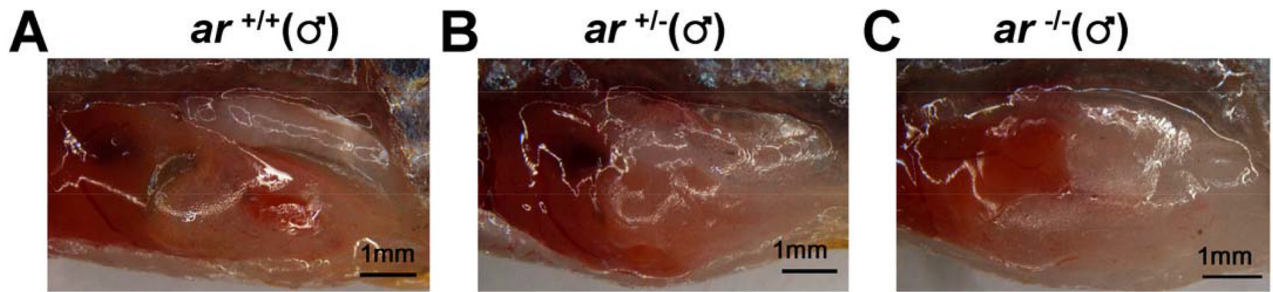

Supplementary Figure 3: General appearance of testis from wildtype (*ar*<sup>+/+</sup>), heterozygous (*ar*<sup>+/-</sup>) and homozygous (*ar*<sup>-/-</sup>) zebrafish at 4.5 mpf. (A) *ar*<sup>+/+</sup>. (B) *ar*<sup>+/-</sup>. (C) *ar*<sup>-/-</sup>. Mpf, months post fertilization.

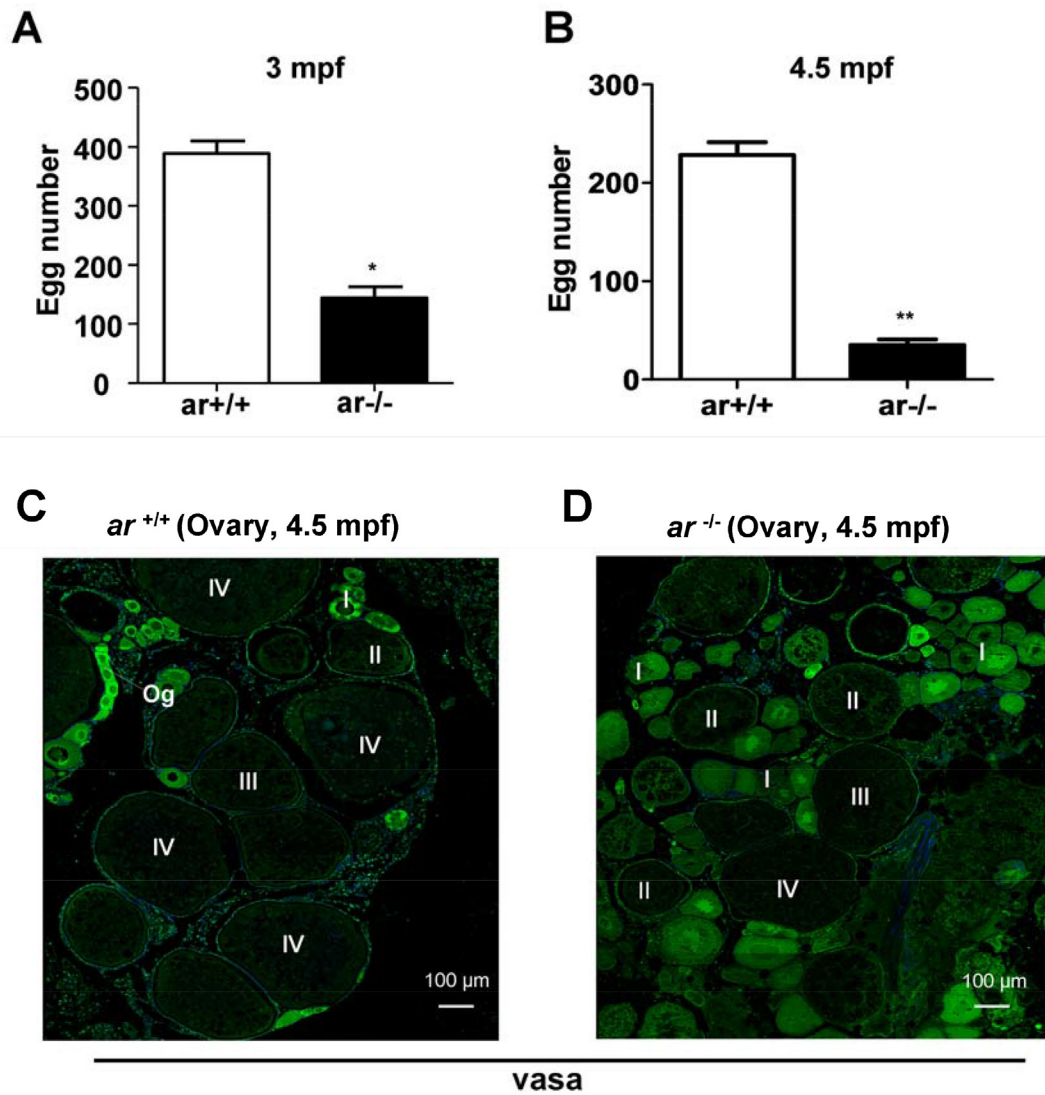

**Supplementary Figure 4:** (A, B) At 3 or 4.5 mpf, ovary eggs were fewer in *ar*<sup>-/-</sup> females compared to wildtype siblings (*ar*<sup>+/+</sup>) (n=5 groups, which were measured everyday for 2 weeks). (C, D) Immunofluorescent staining using anti-vasa antibody identified different stages of oogenesis in ovaries from wildtype (*ar*<sup>+/+</sup>) and homozygous (*ar*<sup>-/-</sup>) (*ar*<sup>*thb1225/thb1225*</sup>) zebrafish at 4.5 mpf. I, stage I oocyte; II, stage II; III, stage III; IV, stage IV. Mpf, months post fertilization.

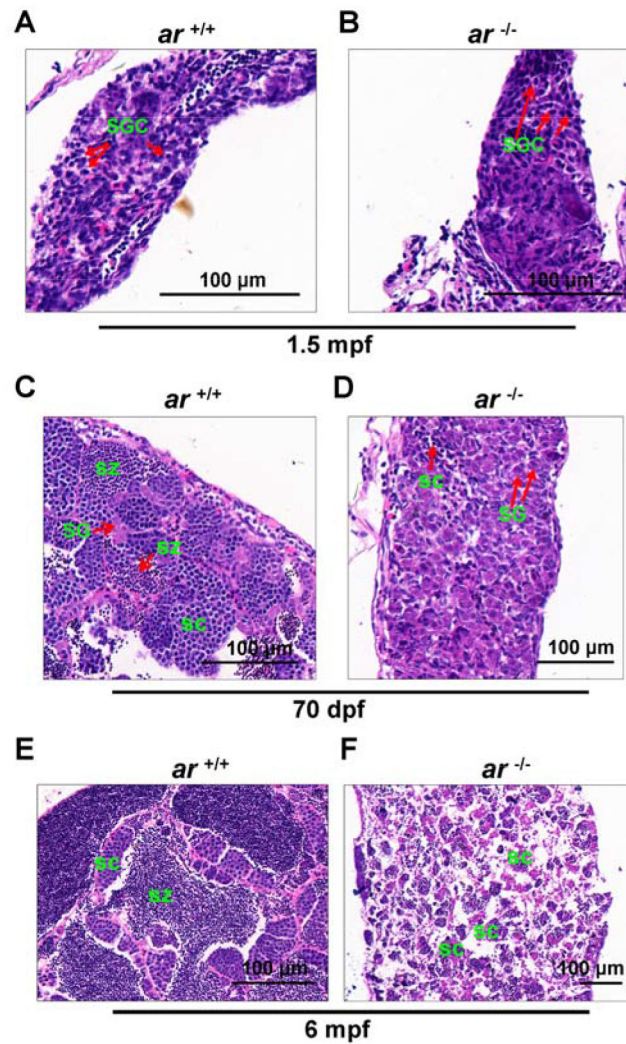

**Supplementary Figure 5: Histology of testis from wildtype (*ar*<sup>+/+</sup>), and homozygous (*ar*<sup>-/-</sup>) (the mutant 1) zebrafish at 1.5 mpf, 70dpf and 5 mpf. (A, B) Histology of testes from the wildtype (*ar*<sup>+/+</sup>) and homozygous (*ar*<sup>-/-</sup>) (*ar*<sup>ihb1225/ihb1225</sup>) zebrafish at 1.5 mpf. No obvious difference between *ar*<sup>-/-</sup> and wildtype sibling (*ar*<sup>+/+</sup>) testes. SGC, spermatogonial cysts (indicated with red arrows). (C, D) Histology of testes from the wildtype (*ar*<sup>+/+</sup>) and homozygous (*ar*<sup>-/-</sup>) (*ar*<sup>ihb1225/ihb1225</sup>) zebrafish at 70 dpf. Compared with wildtype sibling testes, spermatogenesis of *ar*<sup>-/-</sup> testes was delayed as indicated by more spermatogonia (SG) and fewer spermatocytes (SC), but no spermatozoa (SZ). (E, F) Histology of testes from the wildtype (*ar*<sup>+/+</sup>) and homozygous (*ar*<sup>-/-</sup>) zebrafish at 6 mpf. *ar*<sup>-/-</sup> testes were degenerated and loose; but spermatozoa were filled in wildtype sibling (*ar*<sup>+/+</sup>) testes. Dpf, days post fertilization; Mpf, months post fertilization.**

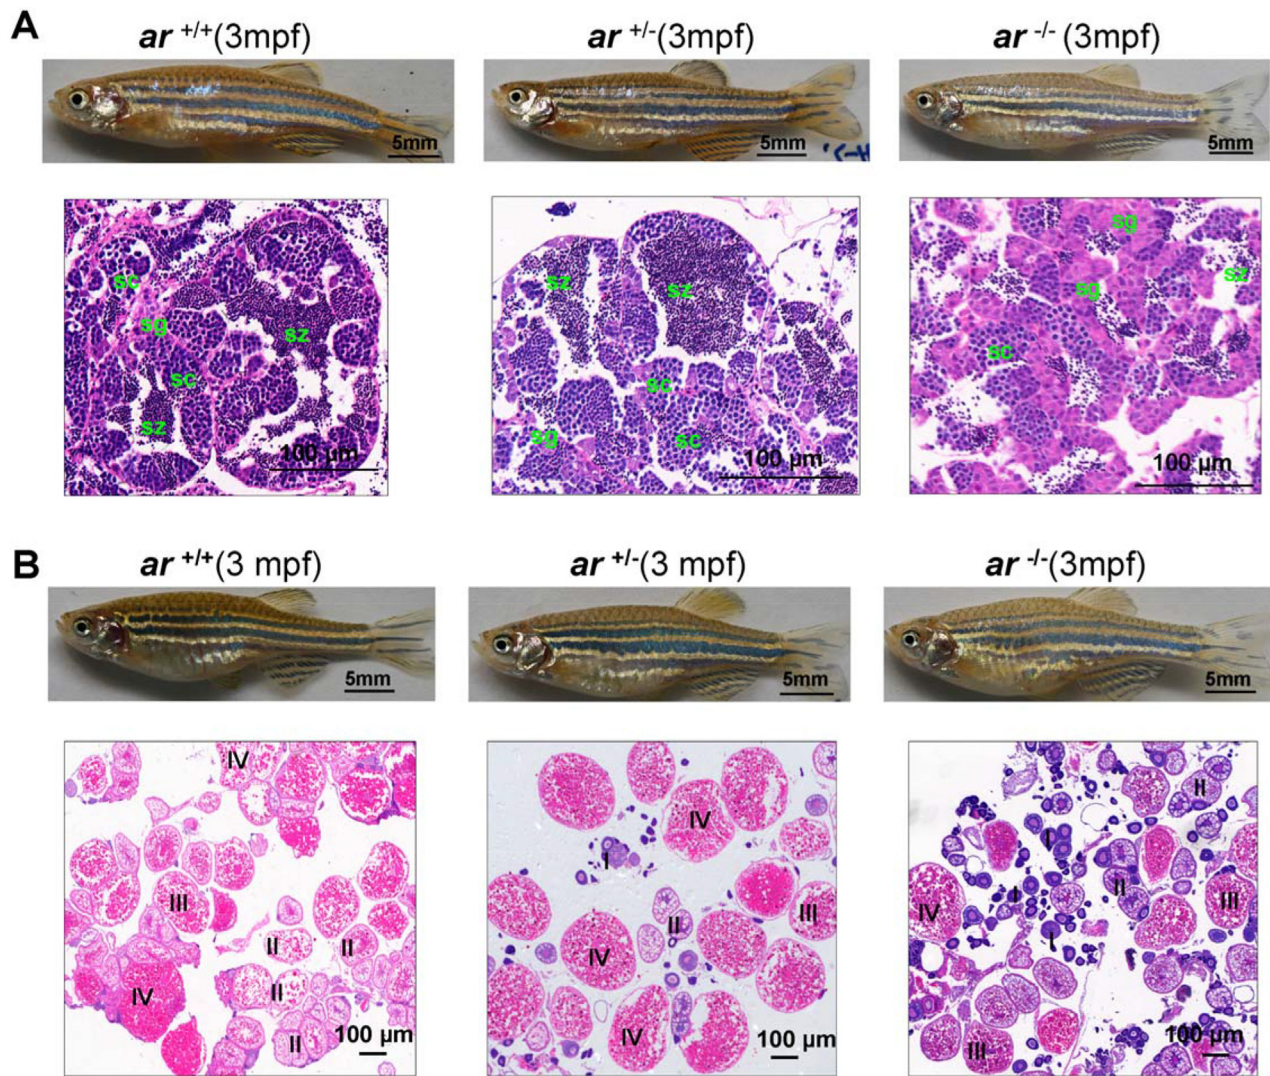

Supplementary Figure 6: Histology of testis and ovary from wildtype (*ar*<sup>+/+</sup>), heterozygous (*ar*<sup>+/-</sup>) and homozygous (*ar*<sup>-/-</sup>) (the mutant 2) zebrafish at 3 mpf. (A) Testis. (B) Ovary. Mpf, months post fertilization.

Supplementary Table 1: List of gene symbol and gene name used in the text and figures.

See Supplementary File 1

Supplementary Table 2: The primer sequences.

See Supplementary File 2
